# Supplementary material for: Tunable fabrication of new theranostic Fe3O4-black TiO2 nanocomposites: dual wavelength stimulated synergistic imaging-guided phototherapy in cancer
Source: Royal Society of Chemistry journal article supplement (doi:10.1039/c8tb02704h), 2018-11-26
Supplement: c8tb02704h1.pdf [file c8tb02704h1.pdf]

## Supporting Information

### Tunable Fabrication of a New Theranostic Fe<sub>3</sub>O<sub>4</sub>-black TiO<sub>2</sub> Nanocomposites: Dual Wavelength Stimulated Synergistic Imaging-guided Phototherapy in Cancer

Madiha Saeed<sup>†,§</sup>, M. Zubair Iqbal<sup>†,\*</sup>, Wenzhi Ren<sup>†,§</sup>, Yuanzhi Xia<sup>†</sup>, Waheed S. Khan<sup>†,‡</sup>, Aiguo Wu<sup>†,\*</sup>

<sup>†</sup> CAS Key Laboratory of Magnetic Materials and Devices, & Key Laboratory of Additive Manufacturing Materials of Zhejiang Province, & Division of Functional Materials and Nanodevices, Ningbo Institute of Materials Technology and Engineering, Chinese Academy of Sciences, Ningbo, 315201, P.R. China

<sup>§</sup> University of Chinese Academy of Sciences, No.19(A) Yuquan Road, Shijingshan District, Beijing, 100049, P.R. China

<sup>‡</sup> National Institute for Biotechnology and Genetic Engineering (NIBGE), P.O. Box. 577, Jhang Road, Faisalabad, Pakistan

\*Corresponding author Email: [aiguo@nimte.ac.cn](mailto:aiguo@nimte.ac.cn), [zubair@nimte.ac.cn](mailto:zubair@nimte.ac.cn)

Tel: 86 574 87617278; Fax: +86-57486685163

| FeCl <sub>3</sub> ·6H <sub>2</sub> O | Sodium acetate | b-TiO <sub>2</sub> (mg) | Fe-Ti Ratio | VSM emu g <sup>-1</sup> |
|--------------------------------------|----------------|-------------------------|-------------|-------------------------|
| 0.2 (40 mM)                          | 1.4 (515mM)    | 20                      | 4.5 : 1     |                         |
| 0.2 (40 mM)                          | 1.4 (515mM)    | 30                      | 2 : 1       | 40                      |
| 0.1 (20 mM)                          | 1.4 (515mM)    | 10                      | 3 : 1       | 48                      |
| 0.1 (20 mM)                          | 1.4 (515mM)    | 20                      | 1.7 : 1     | 35                      |

**Table S1.** Influence of reaction parameters on the diameter and saturation magnetization values of Fe-Ti NCs, while other parameters like concentration of PEG, ethylene glycol and reaction time kept constant.

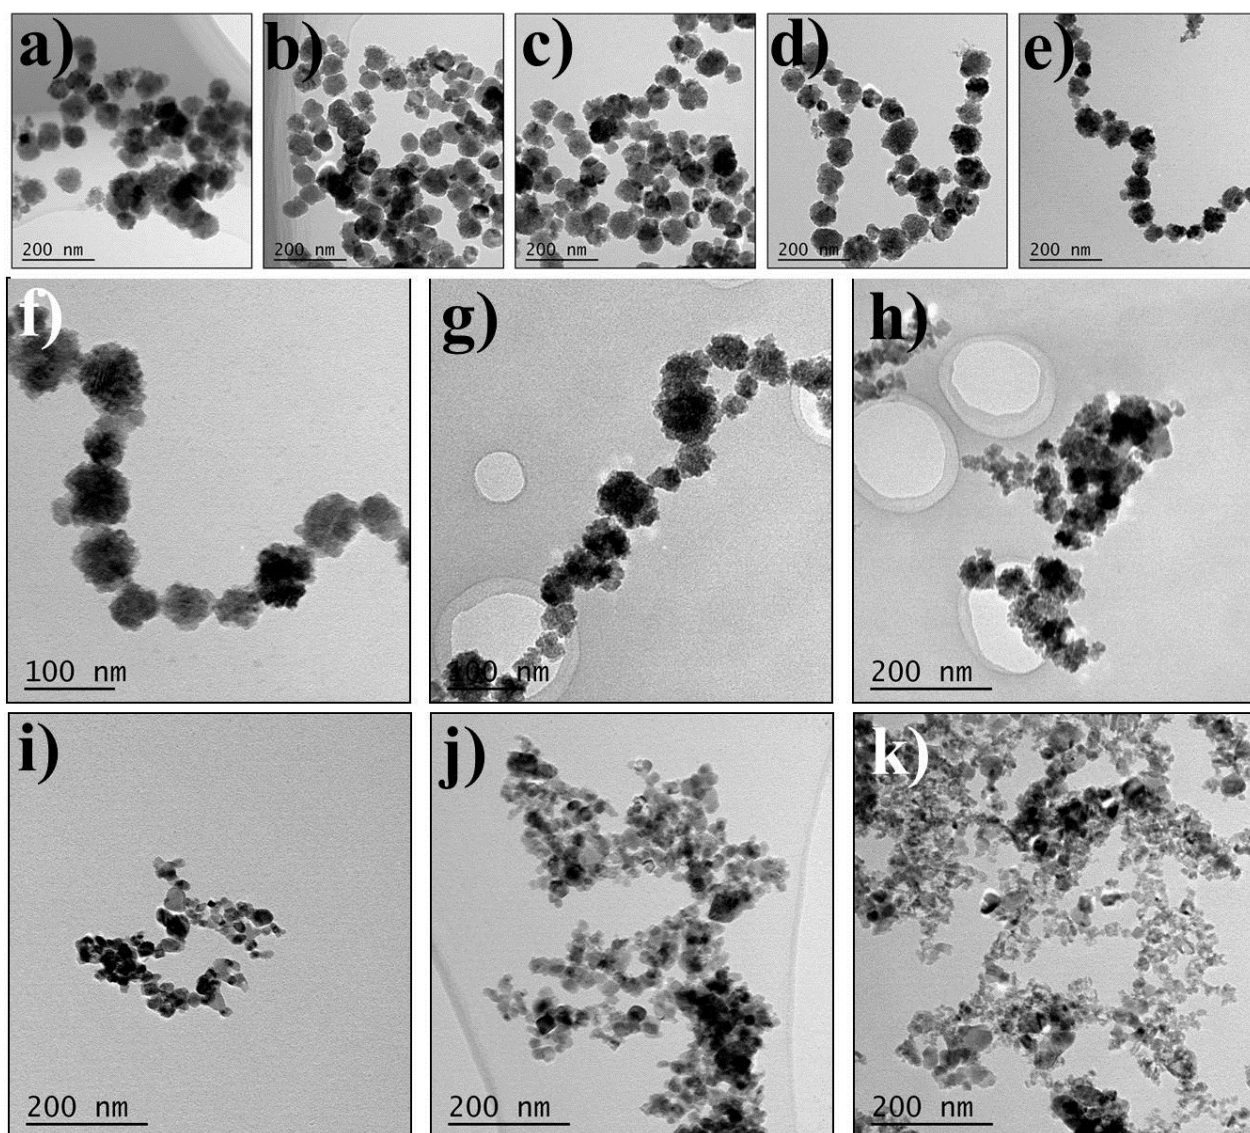

**Figure S1.** TEM images at different time intervals showing the effect of reaction time on the growth of Fe-Ti NCs a) 2.5 h, b) 5 h, c) 7.5 h, d) 10 h, e) 16 h, TEM images of Fe-Ti NCs showing the effect of varying concentration of b-TiO<sub>2</sub> nanoparticles f) 10mg, g) 20 mg, h) 30 mg, TEM image of b-TiO<sub>2</sub> nanoparticles i) in water, after 16 h at 200 °C, j) in the presence of EG, k) in the presence of EG, NaAc·3H<sub>2</sub>O, and PEG.

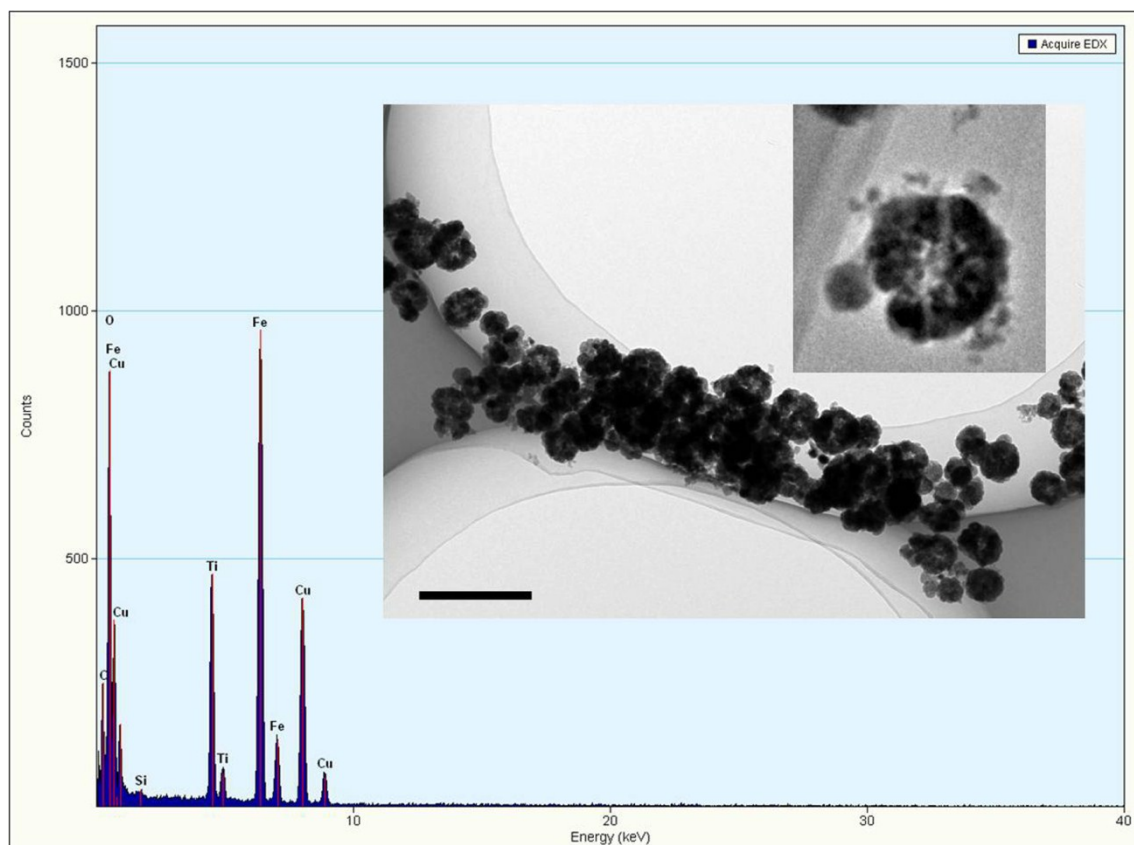

**Figure S2** EDX spectrum and TEM image showing the presence of b-TiO<sub>2</sub> NPs on the surface of Fe<sub>3</sub>O<sub>4</sub> NPs.

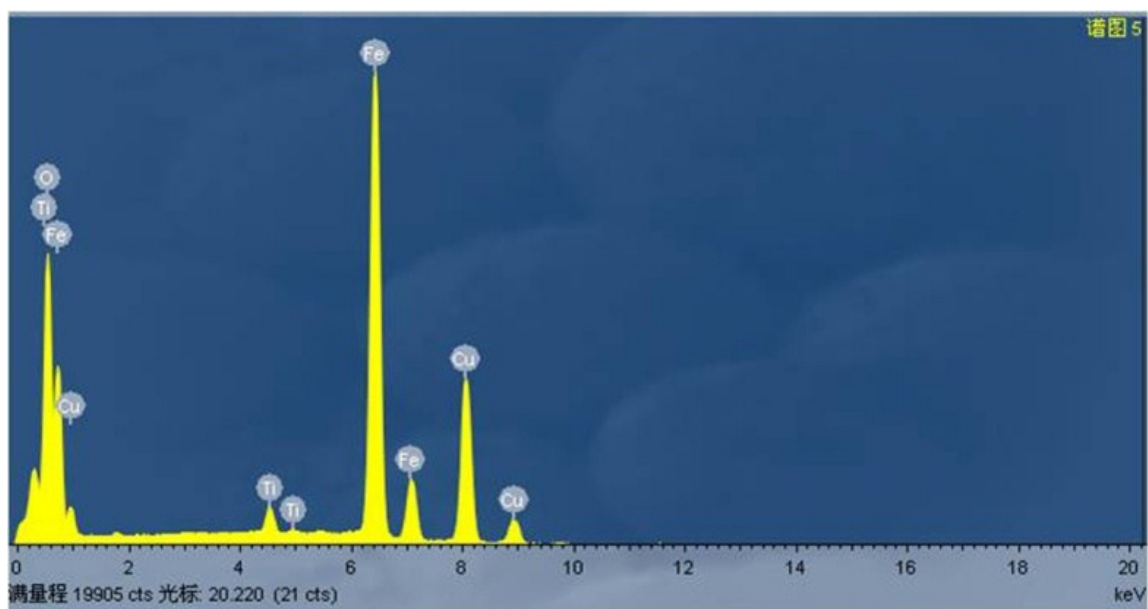

**Figure S3.** EDX spectrum of Fe-Ti NCs shows the presence of Fe, Ti, and O.

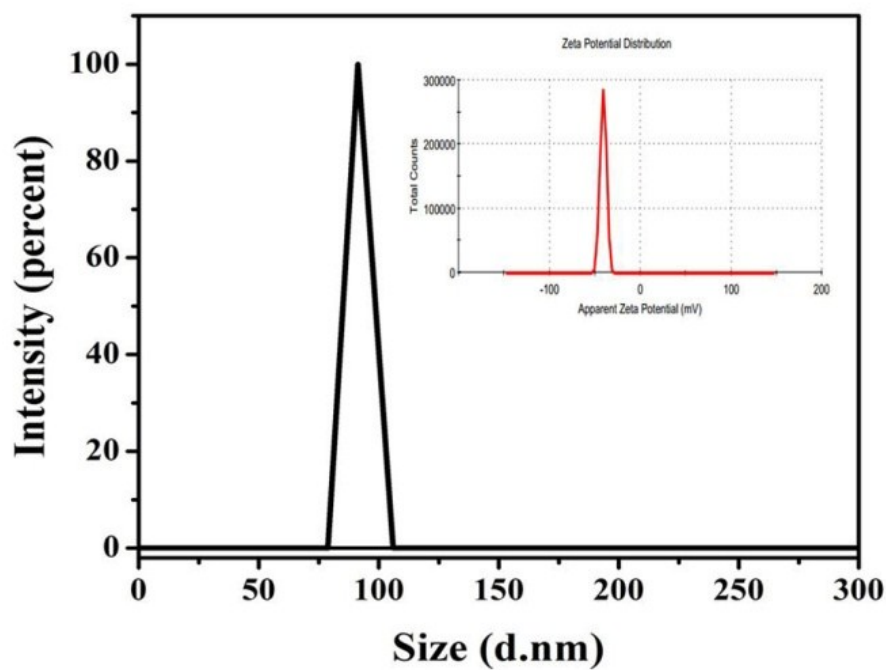

**Figure S4.** Hydrodynamic diameter and zeta potential value of Fe-Ti NCs dispersed in water.

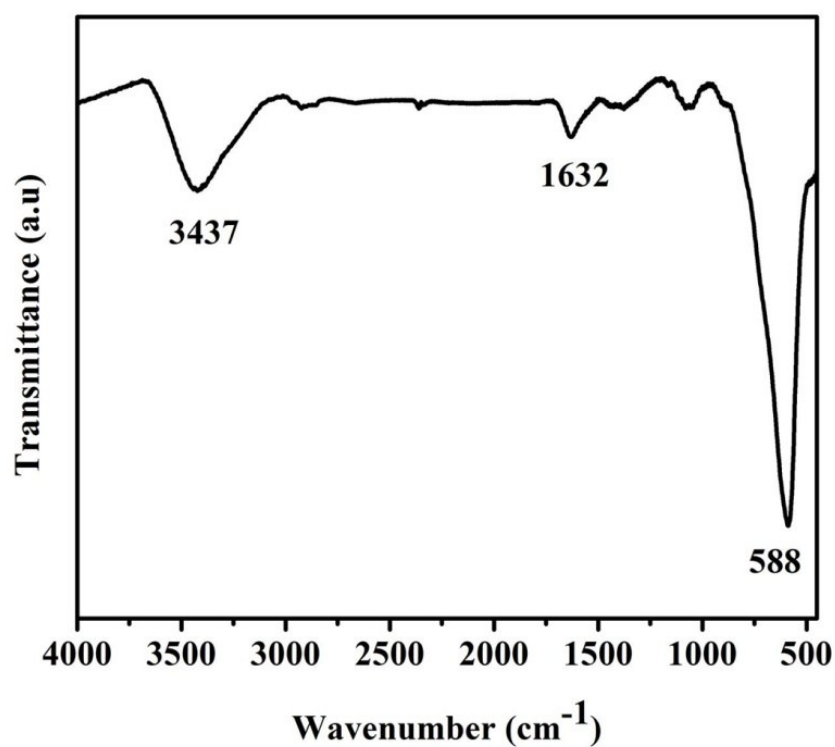

**Figure S5.** The Fourier transform infrared (FTIR) spectra of PEG-coated Fe-Ti NCs.

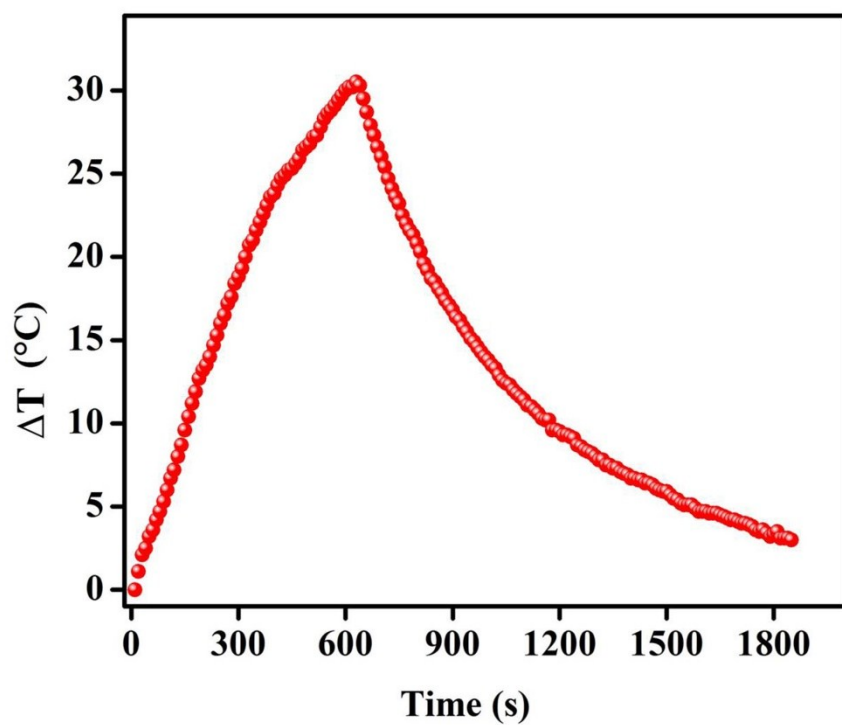

**Figure S6.** The temperature change ( $\Delta T$ ) response of Fe-Ti NCs to laser and then the laser was turn off (cooling period).

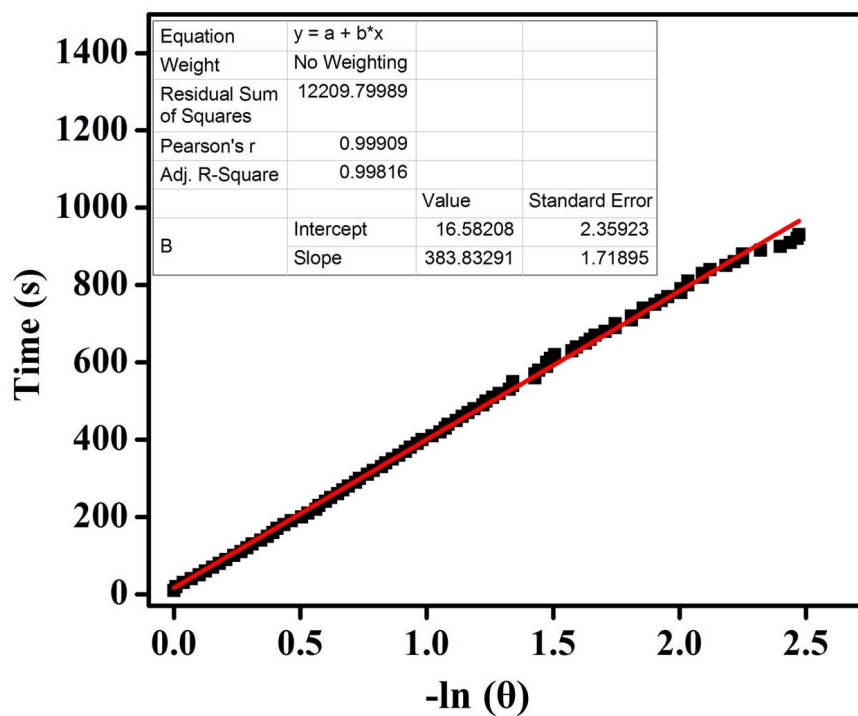

**Figure S7.** Linear time data versus  $-\ln\theta$  calculated from the cooling period.

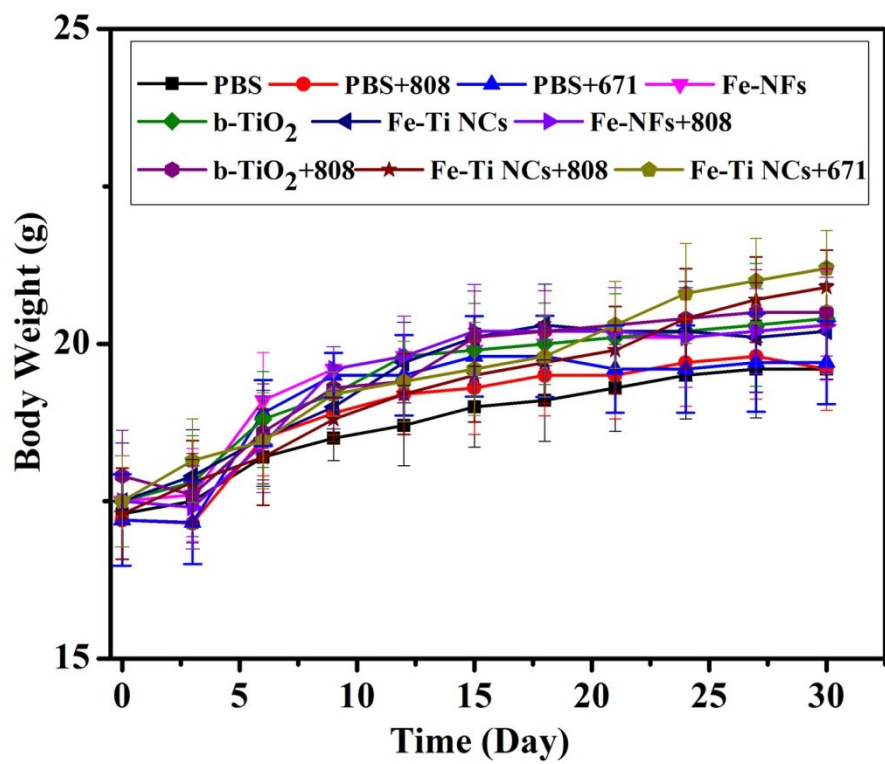

**Figure S8.** Change of body weight from different groups at 30 d post-treatments.
